# Supplementary material for: P-gp expression in brown trout erythrocytes: evidence of a detoxification mechanism in fish erythrocytes
Source: PubMed Central journal article supplement — Sci Rep. 2013 Dec 5;3:3422. doi: 10.1038/srep03422 (PMC3851883; doi:10.1038/srep03422), 2013-12-05

## Supplementary Information

Title of manuscript:

P-gp expression in the brown trout erythrocytes: evidence of a detoxification mechanism in fish erythrocytes

Authors :

Emeline VALTON<sup>1-2-3</sup>, Christian AMBLARD<sup>3</sup>, Ivan WAWRZYNIAK<sup>3</sup>, Frederique PENAULT-LLORCA<sup>1-2</sup> & Mahchid BAMDAD<sup>1\*-2,-3\*</sup>

Supplementary Figure S1a : Full length blot

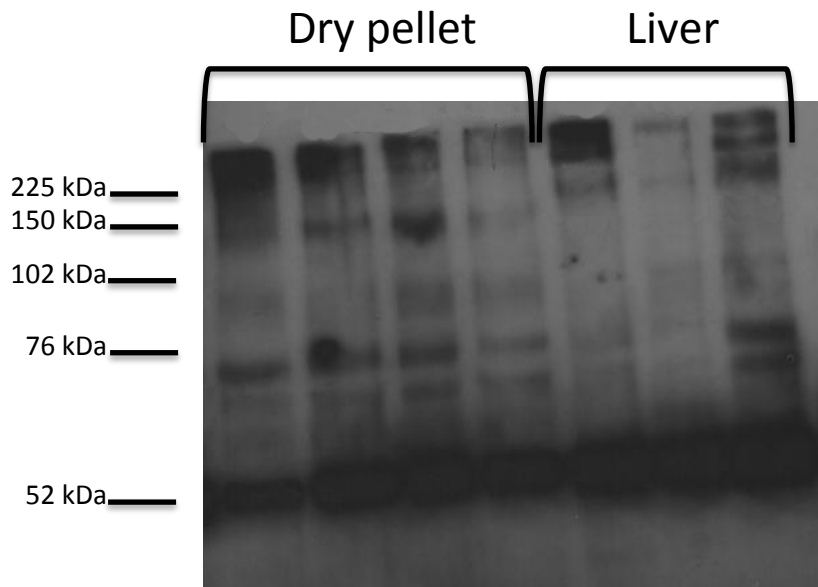

Supplementary Figure S1b : Blue Coomassie gel

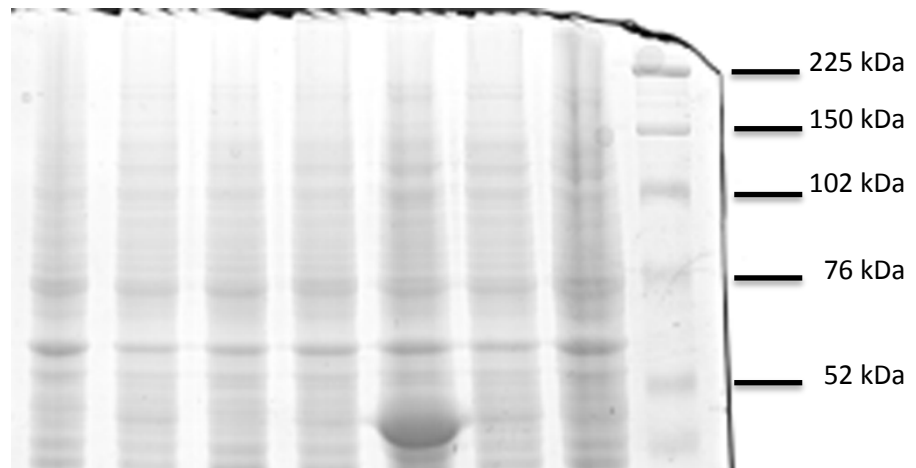

Supplementary Figure S2 : Microscopic view of the red blood cell primary culture (x40)

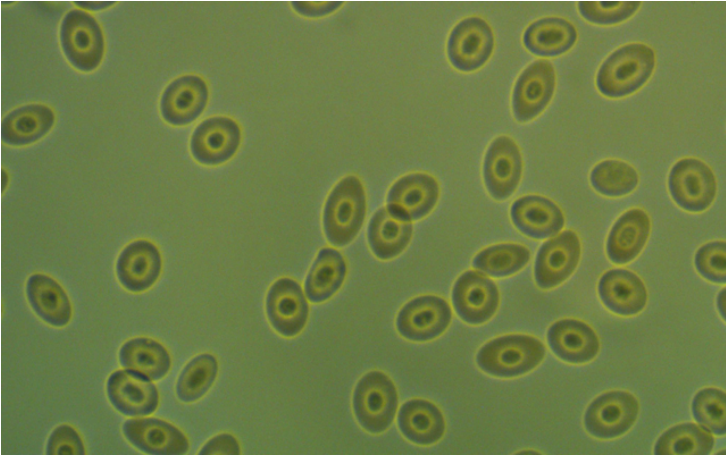

Supplement: srep03422-s1.pdf [file srep03422-s1.pdf]
